# Supplementary material for: The ciliopathy protein CCDC66 controls mitotic progression and cytokinesis by promoting microtubule nucleation and organization
Source: PubMed Central journal article supplement (PMC9333452; doi:10.1371/journal.pbio.3001708), 2022-07-18

**Figure S1C**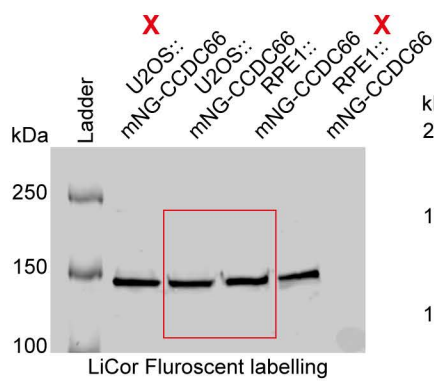**Figure S1D**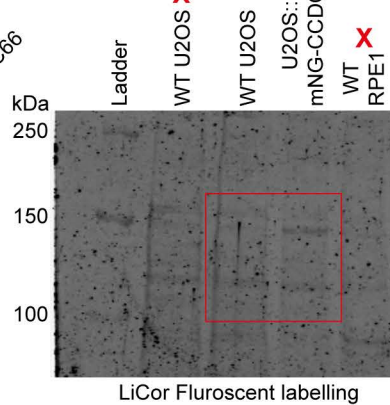**Figure 2E**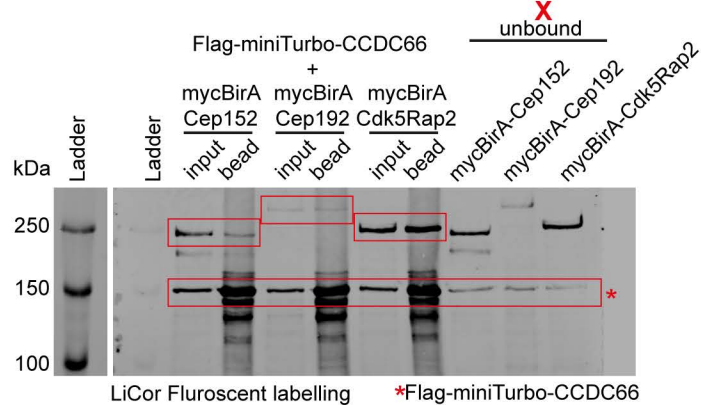**Figure 2E**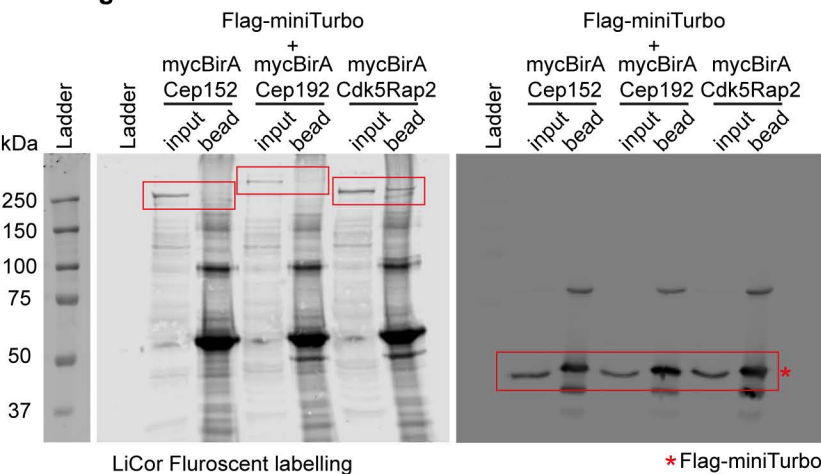**Figure 2E**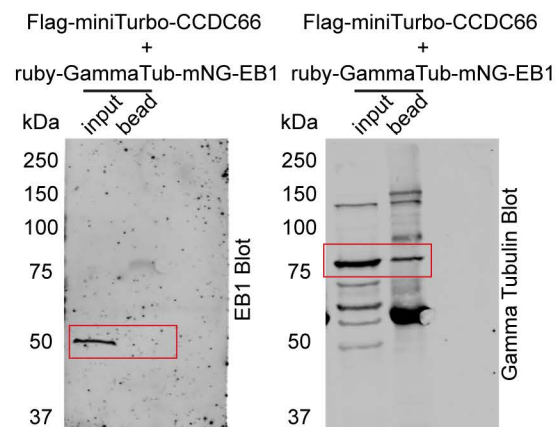**Figure 2F**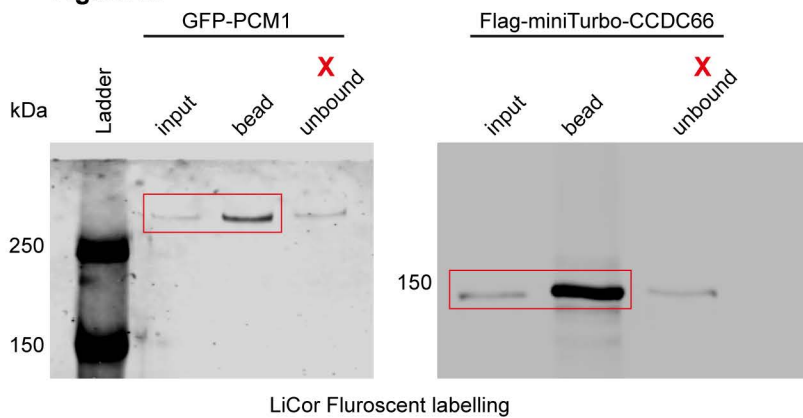**Figure 2F**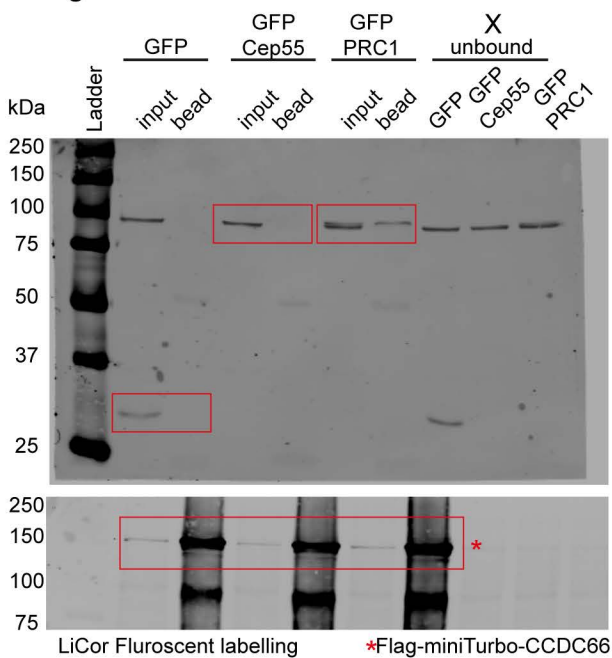**Figure S3A**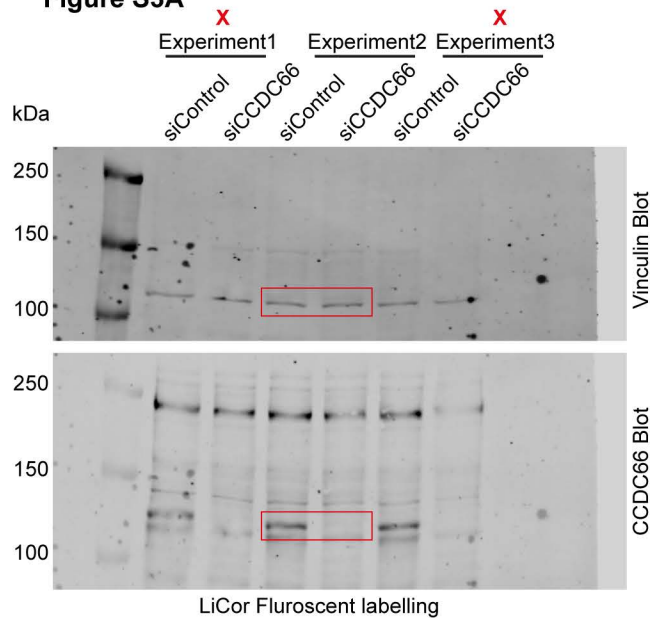

**Figure S4A**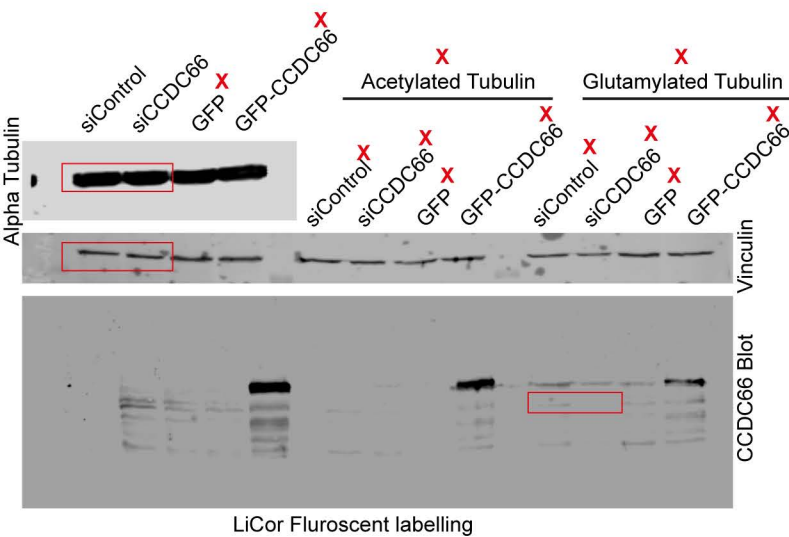**Figure S5C**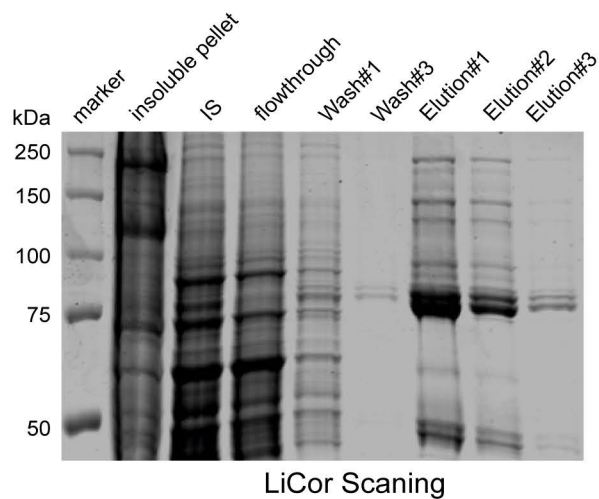**Figure S5D**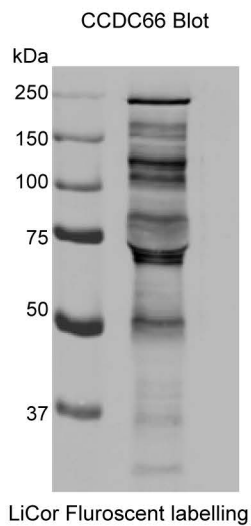**Figure S5E**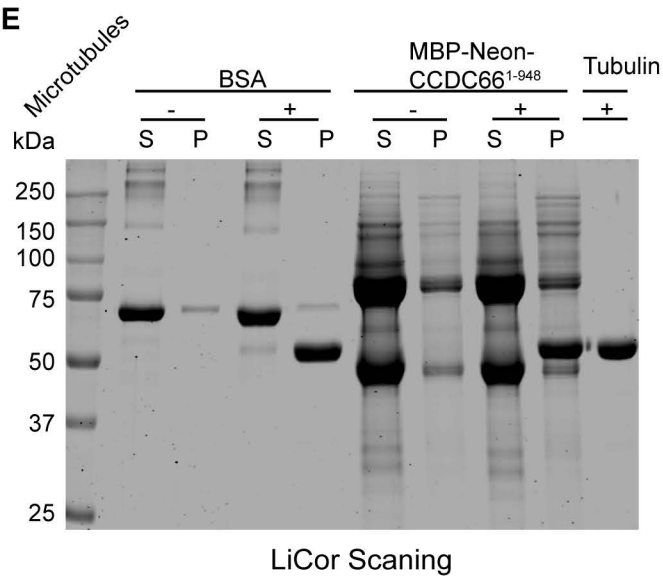**Figure S5F**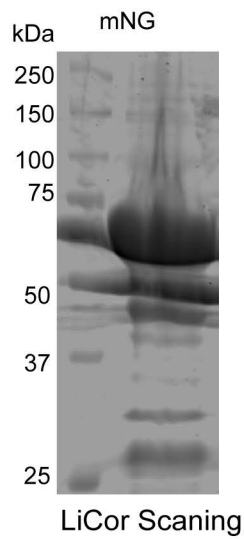**Figure S5G**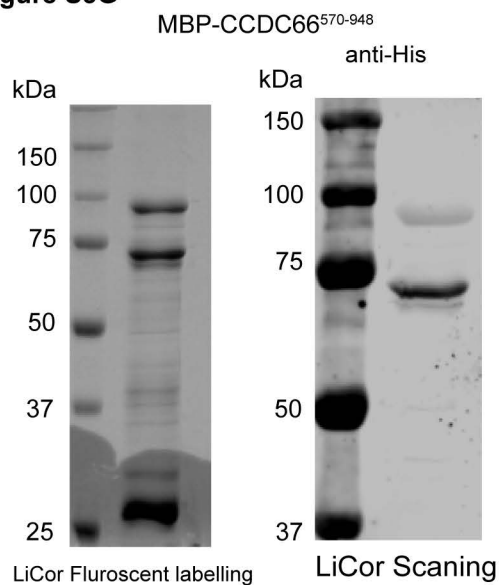**Figure S5H**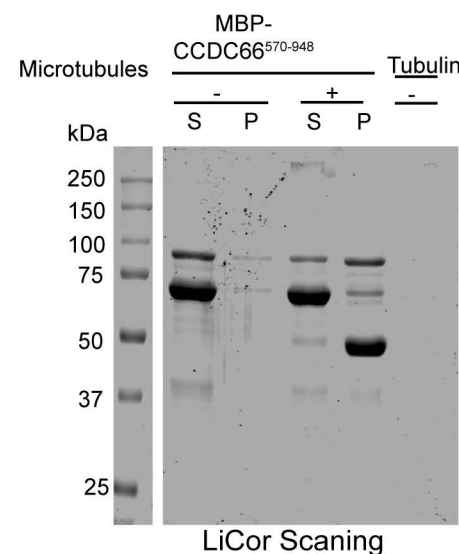

**Figure S6B**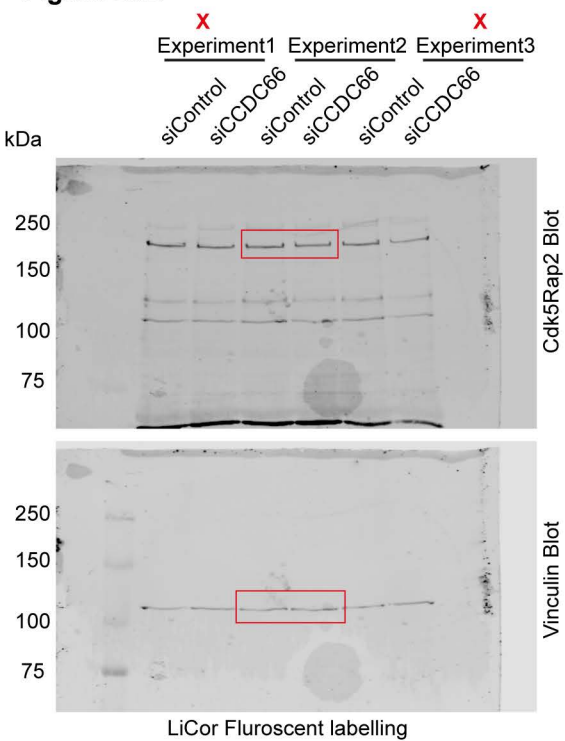**Figure S6B**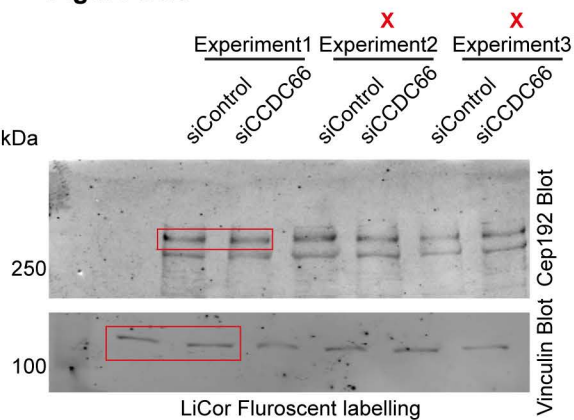**Figure S6B**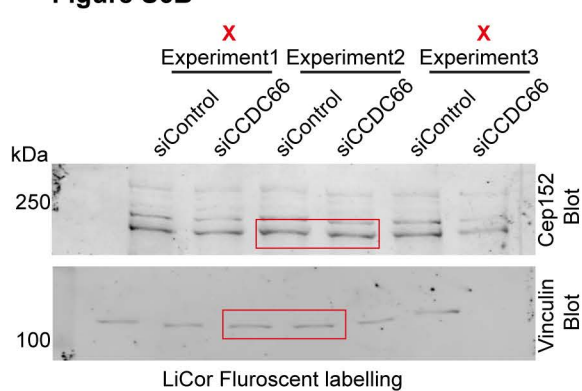**Figure S6B**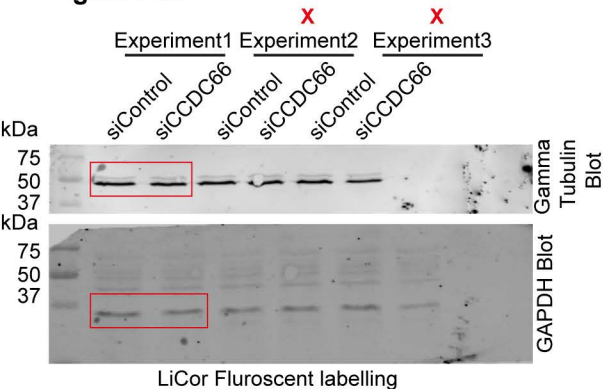**Figure S6B**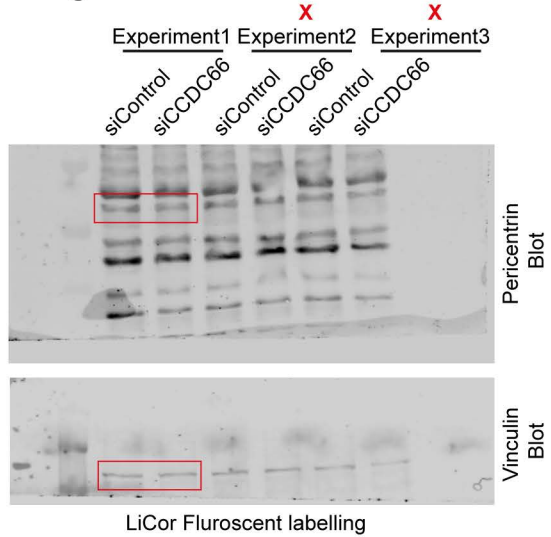

**Figure S7A**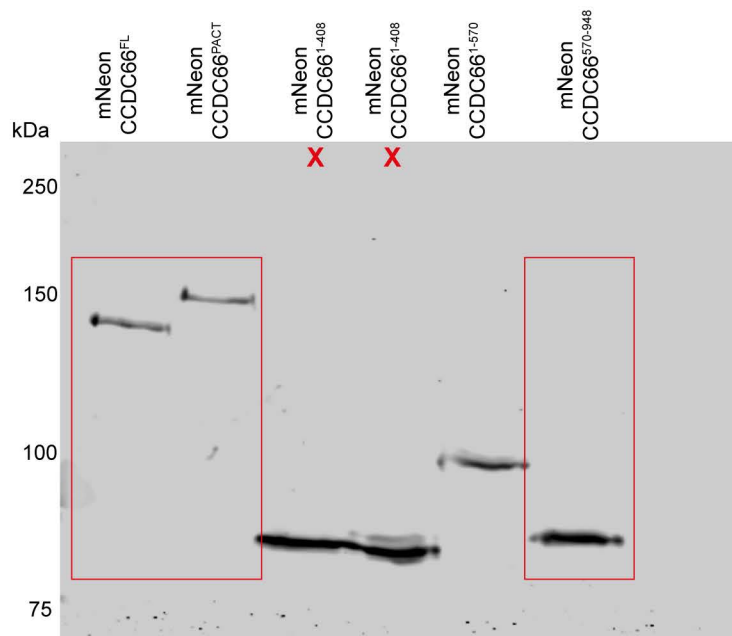**Figure S7B**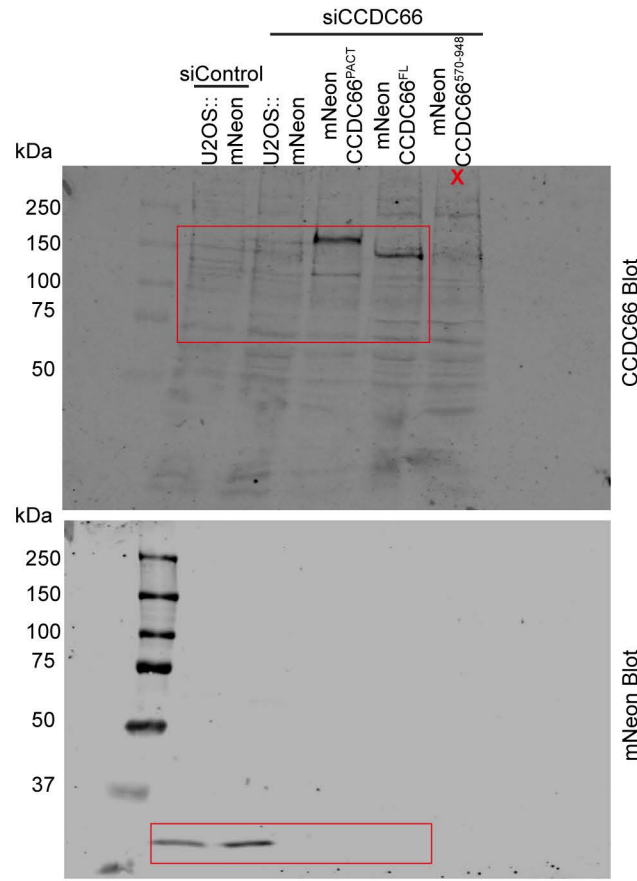**Figure S7B**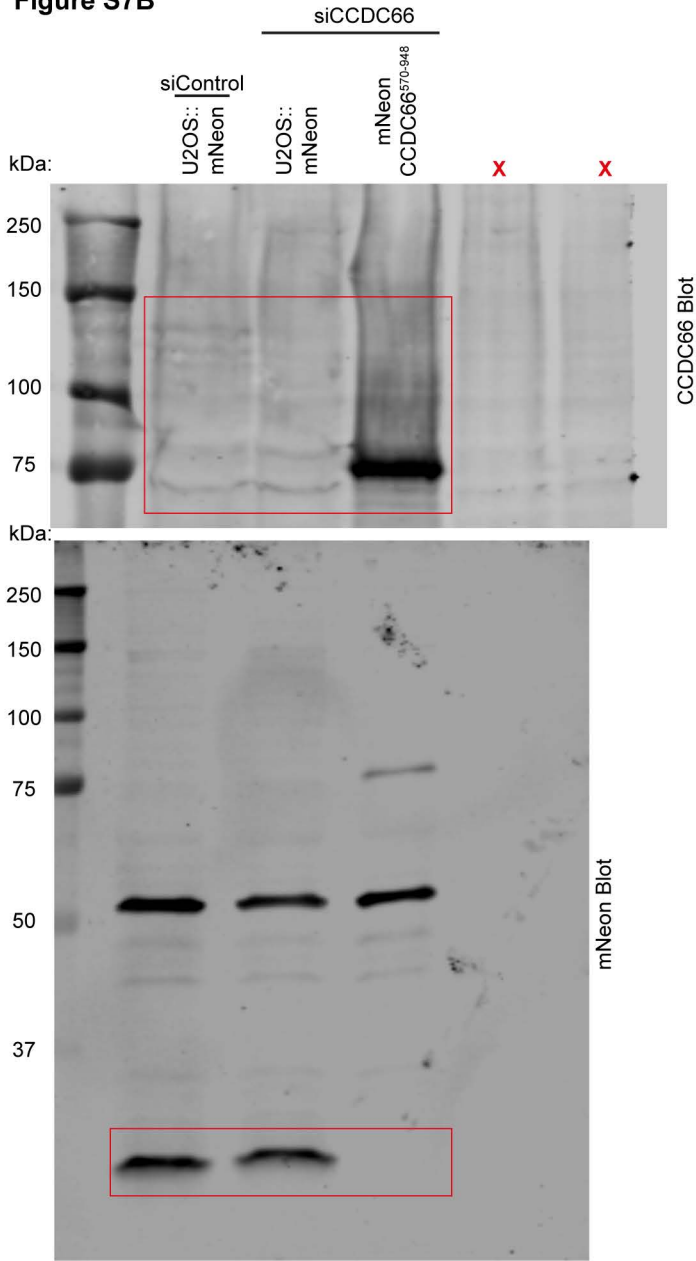

Supplement: pbio.3001708.s008.pdf [file pbio.3001708.s008.pdf]
